# Supplementary material for: Comparison of the Non-Invasive Monitoring of Fresh-Cut Lettuce Condition with Imaging Reflectance Hyperspectrometer and Imaging PAM-Fluorimeter
Source: Preprints.org preprint supplement (doi:10.20944/preprints202109.0049.v1), 2021-09-02
Supplement: Supplementary file 3 [file supplementary]

Fig. A1. Changes in (A) [Chl] and (B) [Car]/[Chl] ratios during storage of the non-sealed (closed symbols) and sealed (open symbols) fresh-cut lettuce leaves.

Fig. A2. Changes in leaf area exhibiting different values of CI678 index (the color-coded images) indicative of [Chl] and (histograms immediately below the corresponding images) the corresponding distribution of the pixel values of the color-coded images in the stored non-sealed fresh-cut lettuce leave. For details, see Materials and Methods.

| Sample # | Time (d) | | | | |
| --- | --- | --- | --- | --- | --- |
| Day 0 | Day 1 | Day 4 | Day 7 | Day 11 |
| 1 | 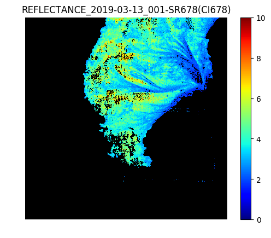 | 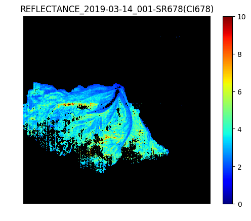 | 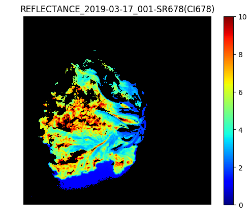 | 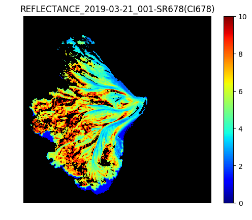 | 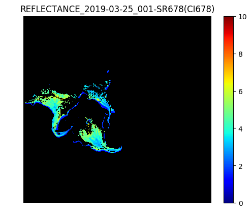 |
| 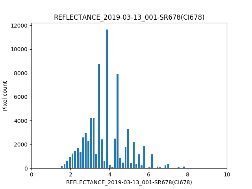 | 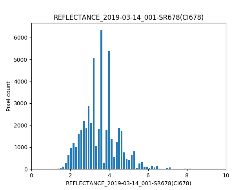 | 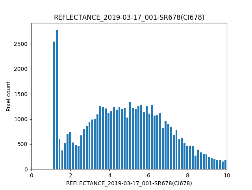 | 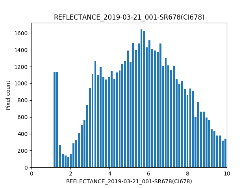 | 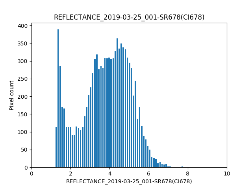 |
| 2 | 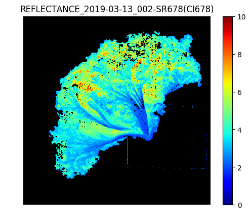 | 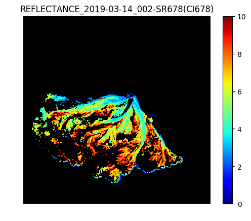 | 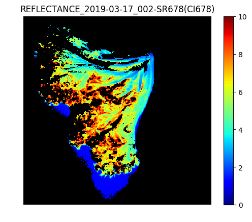 |  | 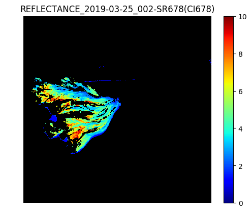 |
| 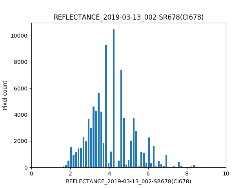 | 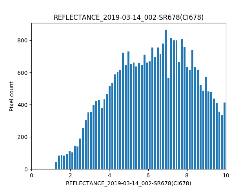 | 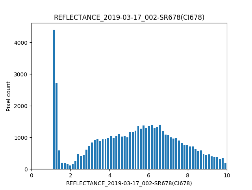 |  | 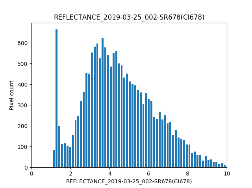 |
| 3 |  | 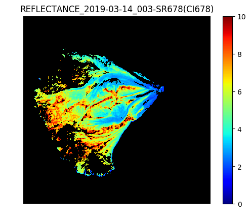 | 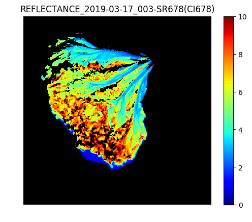 |  | 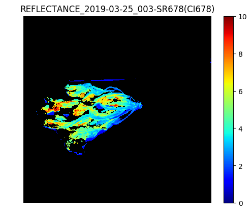 |
|  | 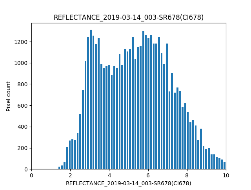 | 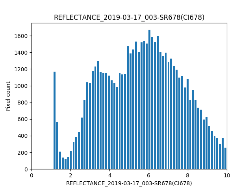 |  | 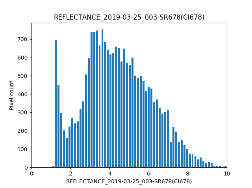 |
| 4 | 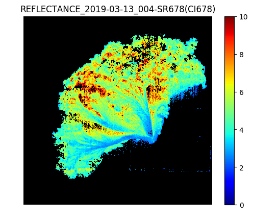 | 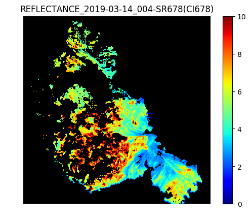 | 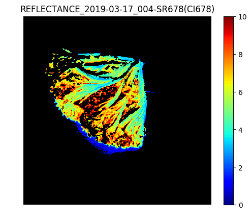 | 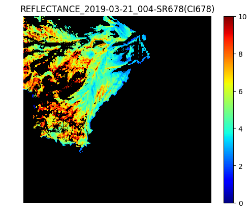 | 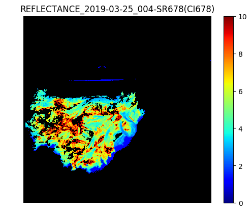 |
| 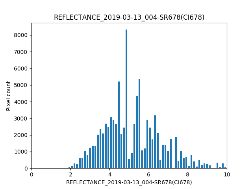 | 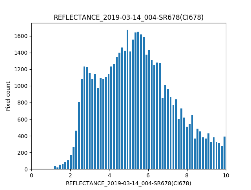 | 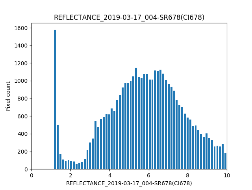 | 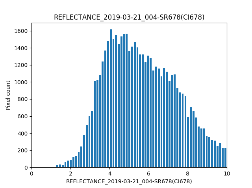 | 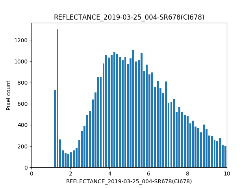 |
| 5 | 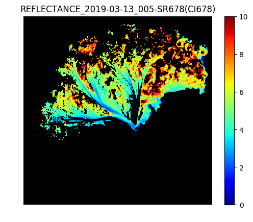 | 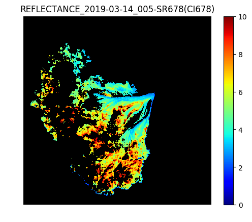 | 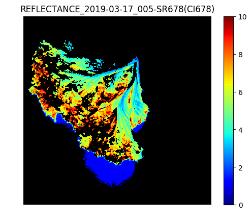 | 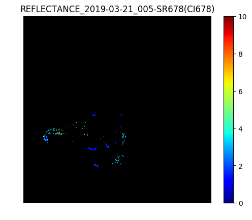 | 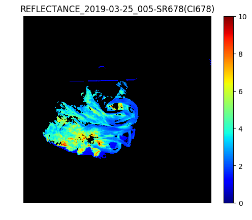 |
| 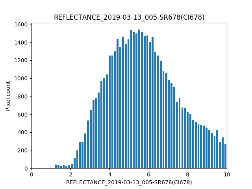 | 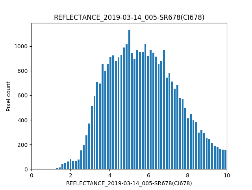 | 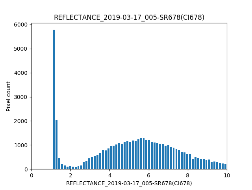 | 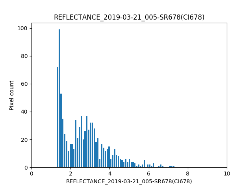 | 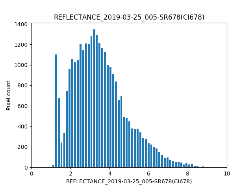 |
| 6 | 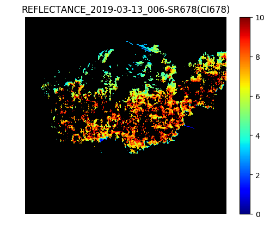 | 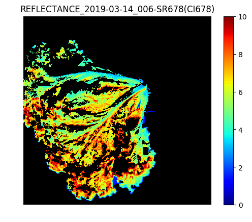 | 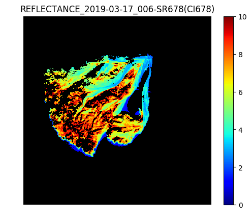 | 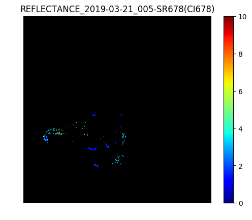 | 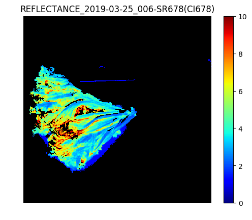 |
| 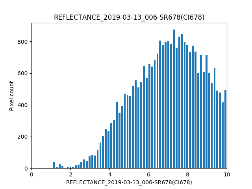 | 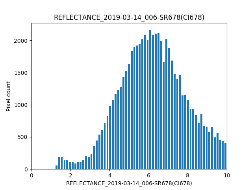 | 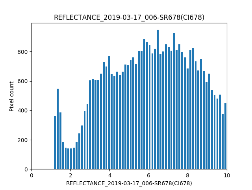 | 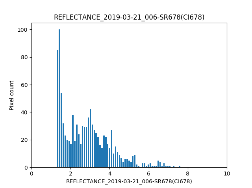 | 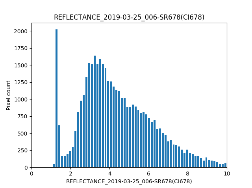 |
| 7 |  | 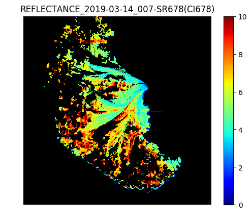 | 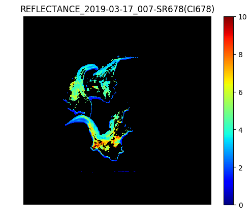 | 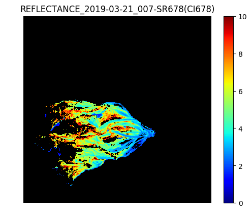 | 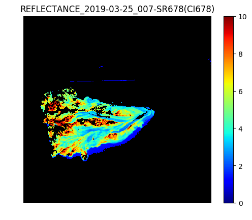 |
|  | 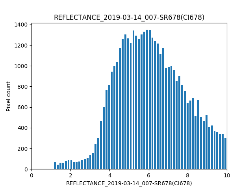 | 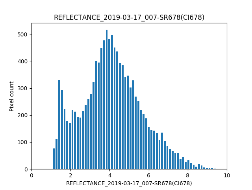 | 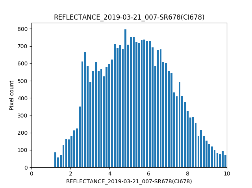 | 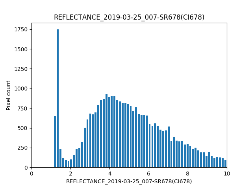 |
| 8 | 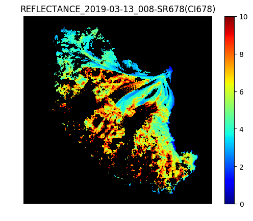 | 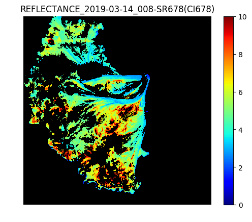 | 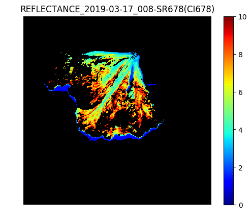 | 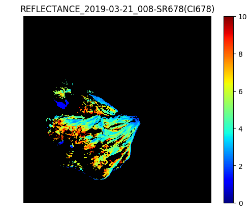 | 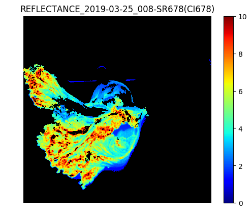 |
| 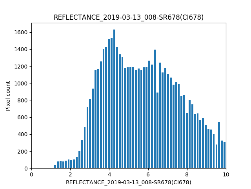 | 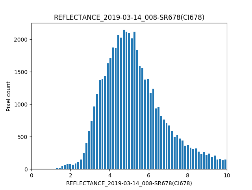 | 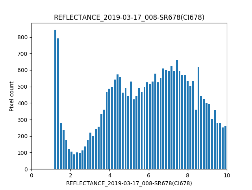 | 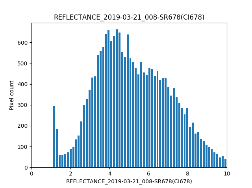 | 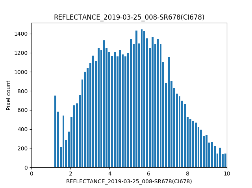 |
| 9 | 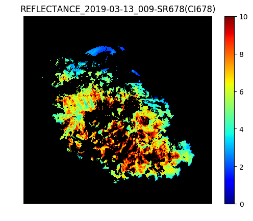 | 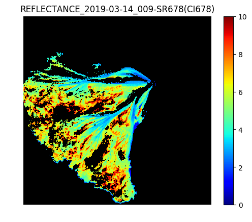 | 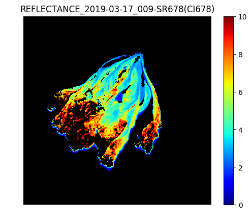 | 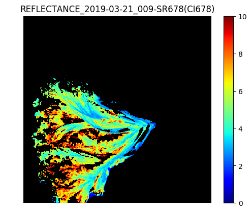 | 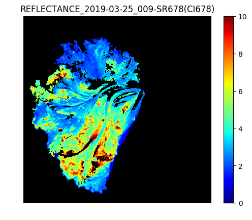 |
| 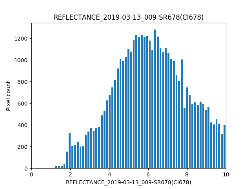 | 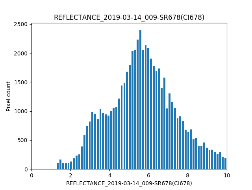 | 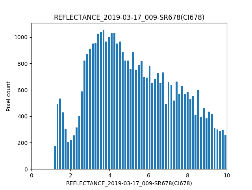 | 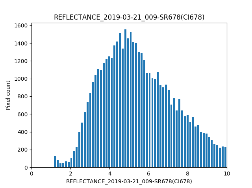 | 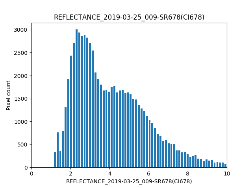 |
| 10 | 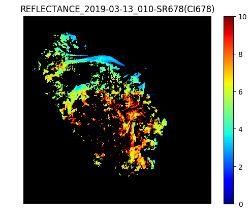 | 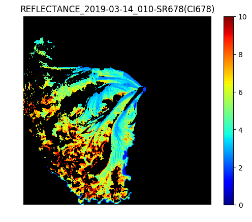 | 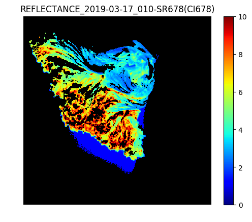 | 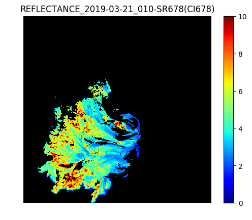 | 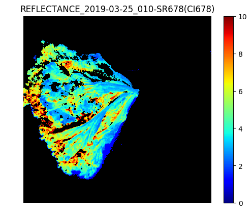 |
| 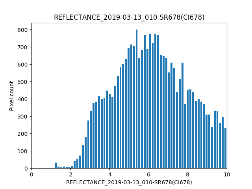 | 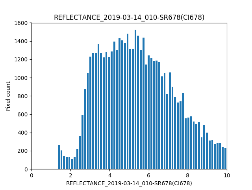 | 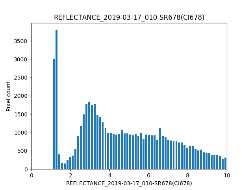 | 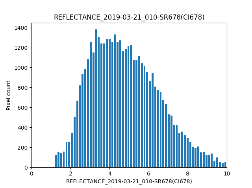 | 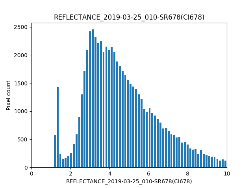 |
| 11 | 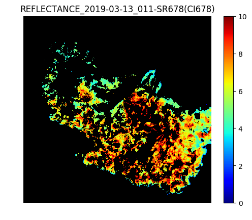 | 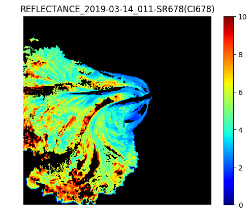 | 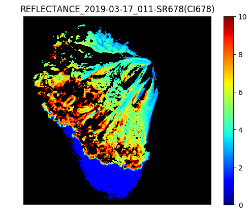 | 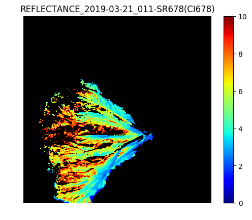 | 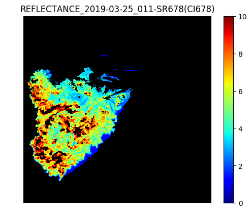 |
| 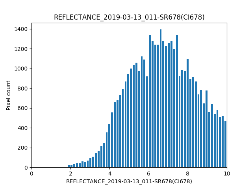 | 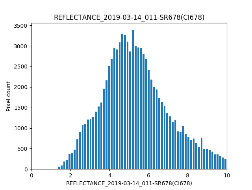 | 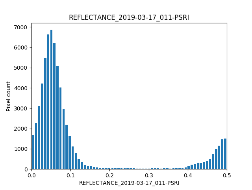 |  |  |
| 12 |  |  |  |  |  |
|  |  |  |  |  |
| 13 |  |  |  |  |  |
|  |  |  |  |  |
| 14 |  |  |  |  |  |
|  |  |  |  |  |
| 15 |  |  |  |  |  |
|  |  |  |  |  |
| 16 |  |  |  |  |  |
|  |  |  |  |  |
| 17 |  |  |  |  |  |
|  |  |  |  |  |
| 18 |  |  |  |  |  |
|  |  |  |  |  |

Fig. A3. Time-course of changes in the relative area of (top graph) non-sealed and (bottom graph) exhibiting the values of the CI678 index in the ranges indicated in the graph annotation.

Fig. A4. Changes in leaf area exhibiting different values of PSRI index (the color-coded images) indicative of [Chl] and (histograms immediately below the corresponding images) the corresponding distribution of the pixel values of the color-coded images in the stored non-sealed fresh-cut lettuce leave. For details, see Materials and Methods.

| Sample # | Time (d) | | | | |
| --- | --- | --- | --- | --- | --- |
| 0 | 1 | 4 | 7 | 11 |
| 1 |  |  |  |  |  |
|  |  |  |  |  |
| 2 |  |  |  |  |  |
|  |  |  |  |  |
| 3 |  |  |  |  |  |
|  |  |  |  |  |
| 4 |  |  |  |  |  |
|  |  |  |  |  |
| 5 |  |  |  |  |  |
|  |  |  |  |  |
| 6 |  |  |  |  |  |
|  |  |  |  |  |
| 7 |  |  |  |  |  |
|  |  |  |  |  |
| 8 |  |  |  |  |  |
|  |  |  |  |  |
| 9 |  |  |  |  |  |
|  |  |  |  |  |
| 10 |  |  |  |  |  |
|  |  |  |  |  |
| 11 |  |  |  |  |  |
|  |  |  |  |  |
| 12 |  |  |  |  |  |
|  |  |  |  |  |
| 13 |  |  |  |  |  |
|  |  |  |  |  |
| 14 |  |  |  |  |  |
|  |  |  |  |  |
| 15 |  |  |  |  |  |
|  |  |  |  |  |
| 16 |  |  |  |  |  |
|  |  |  |  |  |
| 17 |  |  |  |  |  |
|  |  |  |  |  |
| 18 |  |  |  |  |  |
|  |  |  |  |  |

Fig. A5. Time-course of changes in the relative area of (top graph) non-sealed and (bottom graph) exhibiting the values of the PSRI index in the ranges indicated in the graph annotation.
